# Supplementary material for: Real-world Evidence for Adherence and Persistence with Atorvastatin Therapy
Source: PubMed Central journal article supplement — Cardiol Ther. 2021 Sep 29;10(2):445–64. doi: 10.1007/s40119-021-00240-8 (PMC8555050; doi:10.1007/s40119-021-00240-8), 2021-09-29
Supplement: 40119_2021_240_MOESM1_ESM.pdf [file 40119_2021_240_MOESM1_ESM.pdf]

## Supplementary Material

**Title:** Real-world Evidence for Adherence and Persistence with Atorvastatin Therapy

**Table S1** Methods for measuring patient adherence and persistence (as reviewed [A-D])

| Measurement                                            | Details                                                                                                  | Direct/indirect                                                                  |
|--------------------------------------------------------|----------------------------------------------------------------------------------------------------------|----------------------------------------------------------------------------------|
| Medication possession ratio (MPR)                      | Percentage of time patient has medication available using pharmacy data                                  | May overestimate adherence by considering days of overlapping supply<br>Indirect |
| Proportion of days covered (PDC)                       |                                                                                                          | Adjusts for overlapping days of supply and polypharmacy<br>Indirect              |
| Pill count                                             | Drug refill rates using pharmacy data                                                                    | Indirect                                                                         |
| Therapeutic drug monitoring (TDM)                      | Laboratory testing to directly measurement of drugs/metabolites in bodily fluids                         | Direct                                                                           |
| Self-reported questionnaires and structured interviews | Patients are asked to recall their previous medication intake using validated questionnaires (e.g. TSQM) | Indirect                                                                         |
| Electronic monitoring                                  | Inhaled, oral, nebulized electronic monitoring devices and apps                                          | Direct                                                                           |
| Time to discontinuation                                | Duration of time from initiation to discontinuation of therapy                                           | Indirect                                                                         |

TSQM, Treatment Satisfaction Questionnaire for Medication

## Supplement References

- A. Anghel LA, Farcas AM, Oprean RN. An overview of the common methods used to measure treatment adherence. *Med Pharm Rep.* 2019;92:117-122. doi: 10.15386/mpr-1201.
- B. Pednekar PP, Agh T, Malmenas M, *et al.* Methods for measuring multiple medication adherence: a systematic review-report of the ISPOR medication adherence and persistence special interest group. *Value Health.* 2019;22:139-156. doi: 10.1016/j.jval.2018.08.006.
- C. Raebel MA, Schmittziel J, Karter AJ, Konieczny JL, Steiner JF. Standardizing terminology and definitions of medication adherence and persistence in research employing electronic databases. *Med Care.* 2013;51:S11-21. doi: 10.1097/MLR.0b013e31829b1d2a.
- D. Al-Hassany L, Kloosterboer SM, Dierckx B, Koch BC. Assessing methods of measuring medication adherence in chronically ill children-a narrative review. *Patient Prefer Adherence.* 2019;13:1175-1189. doi: 10.2147/PPA.S200058.
